# Supplementary material
Source: MDPI journal article supplement (https://www.mdpi.com/2073-4344/12/1/13)
Supplement: s1 [file s1]

## Supplementary materials

### The effects of Ce and W promoters on the performance of alumina supported nickel catalysts in CO<sub>2</sub> methanation reaction

Wojciech Gac<sup>1,\*</sup>, Witold Zawadzki<sup>1</sup>, Magdalena Greluk<sup>1</sup>, Grzegorz Słowik<sup>1</sup>, Marek Rotko<sup>1</sup>  
and Marcin Kuśmierz<sup>2</sup>

<sup>1</sup>Department of Chemical Technology, <sup>2</sup>Analytical Laboratory, Faculty of Chemistry, Maria Curie-Skłodowska University, 3 M. Curie-Skłodowska Sq., 20-031 Lublin, Poland

\*Correspondence: wojciech.gac@umcs.lublin.pl

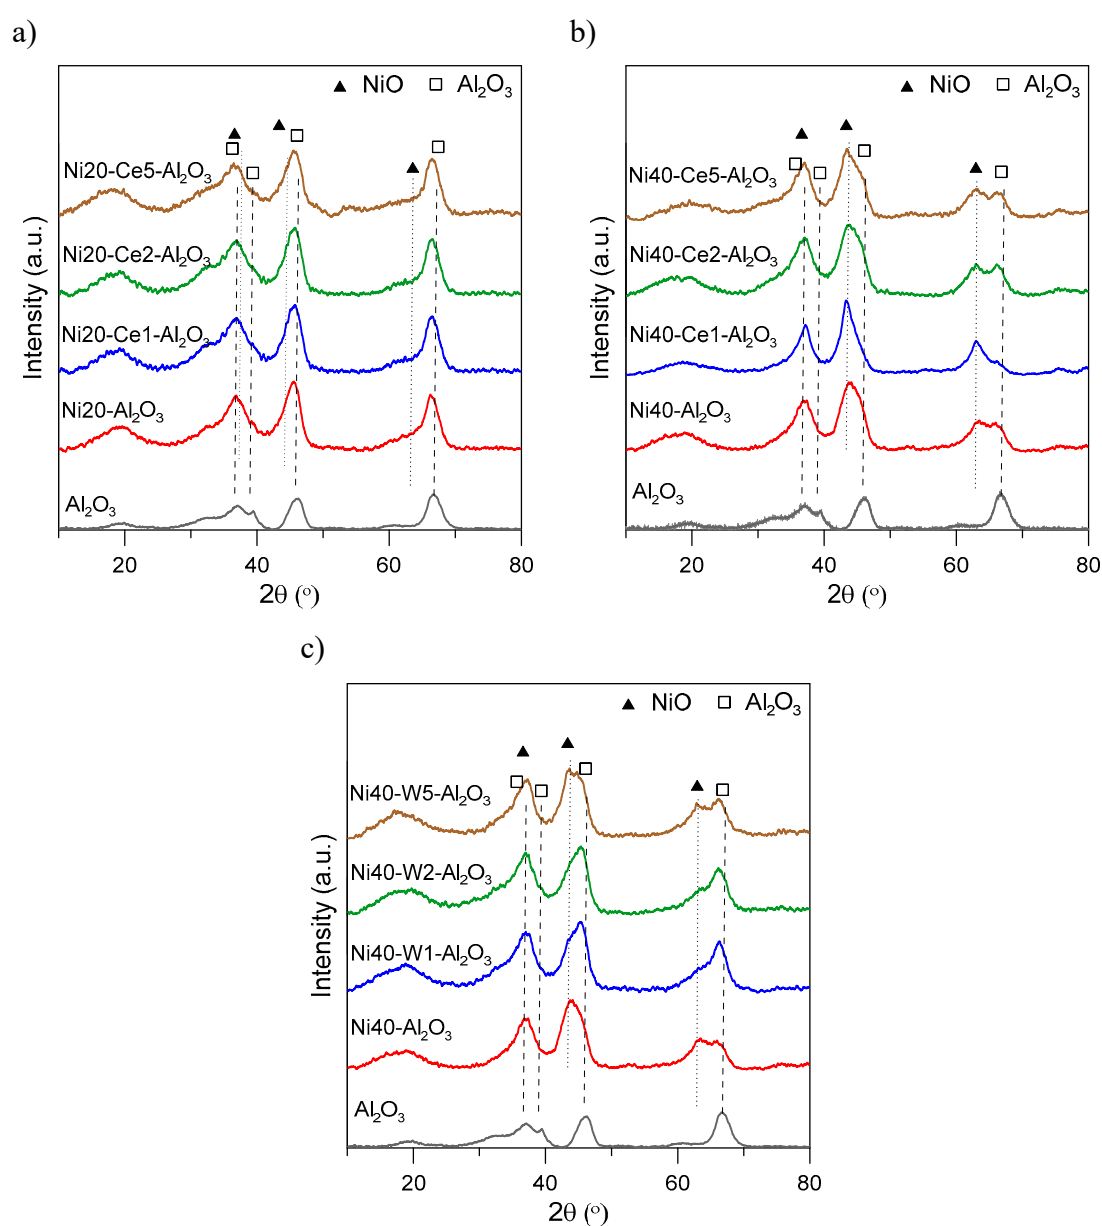

**Figure S1.** X-ray diffraction patterns of catalysts after calcination (a-c).

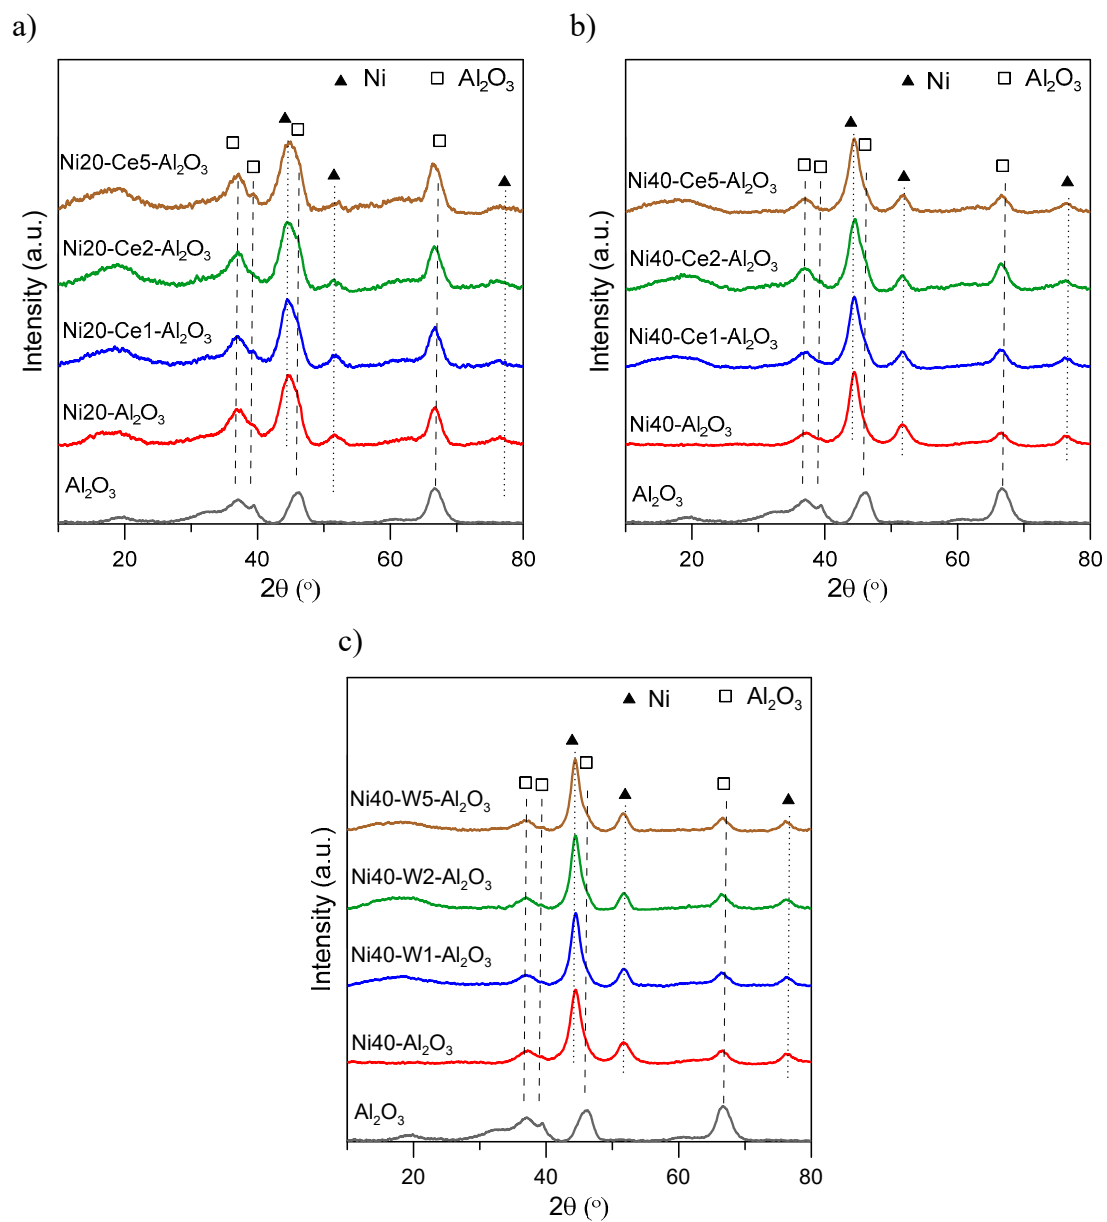

**Figure S2.** X-ray diffraction patterns of catalysts after reduction (a-c).

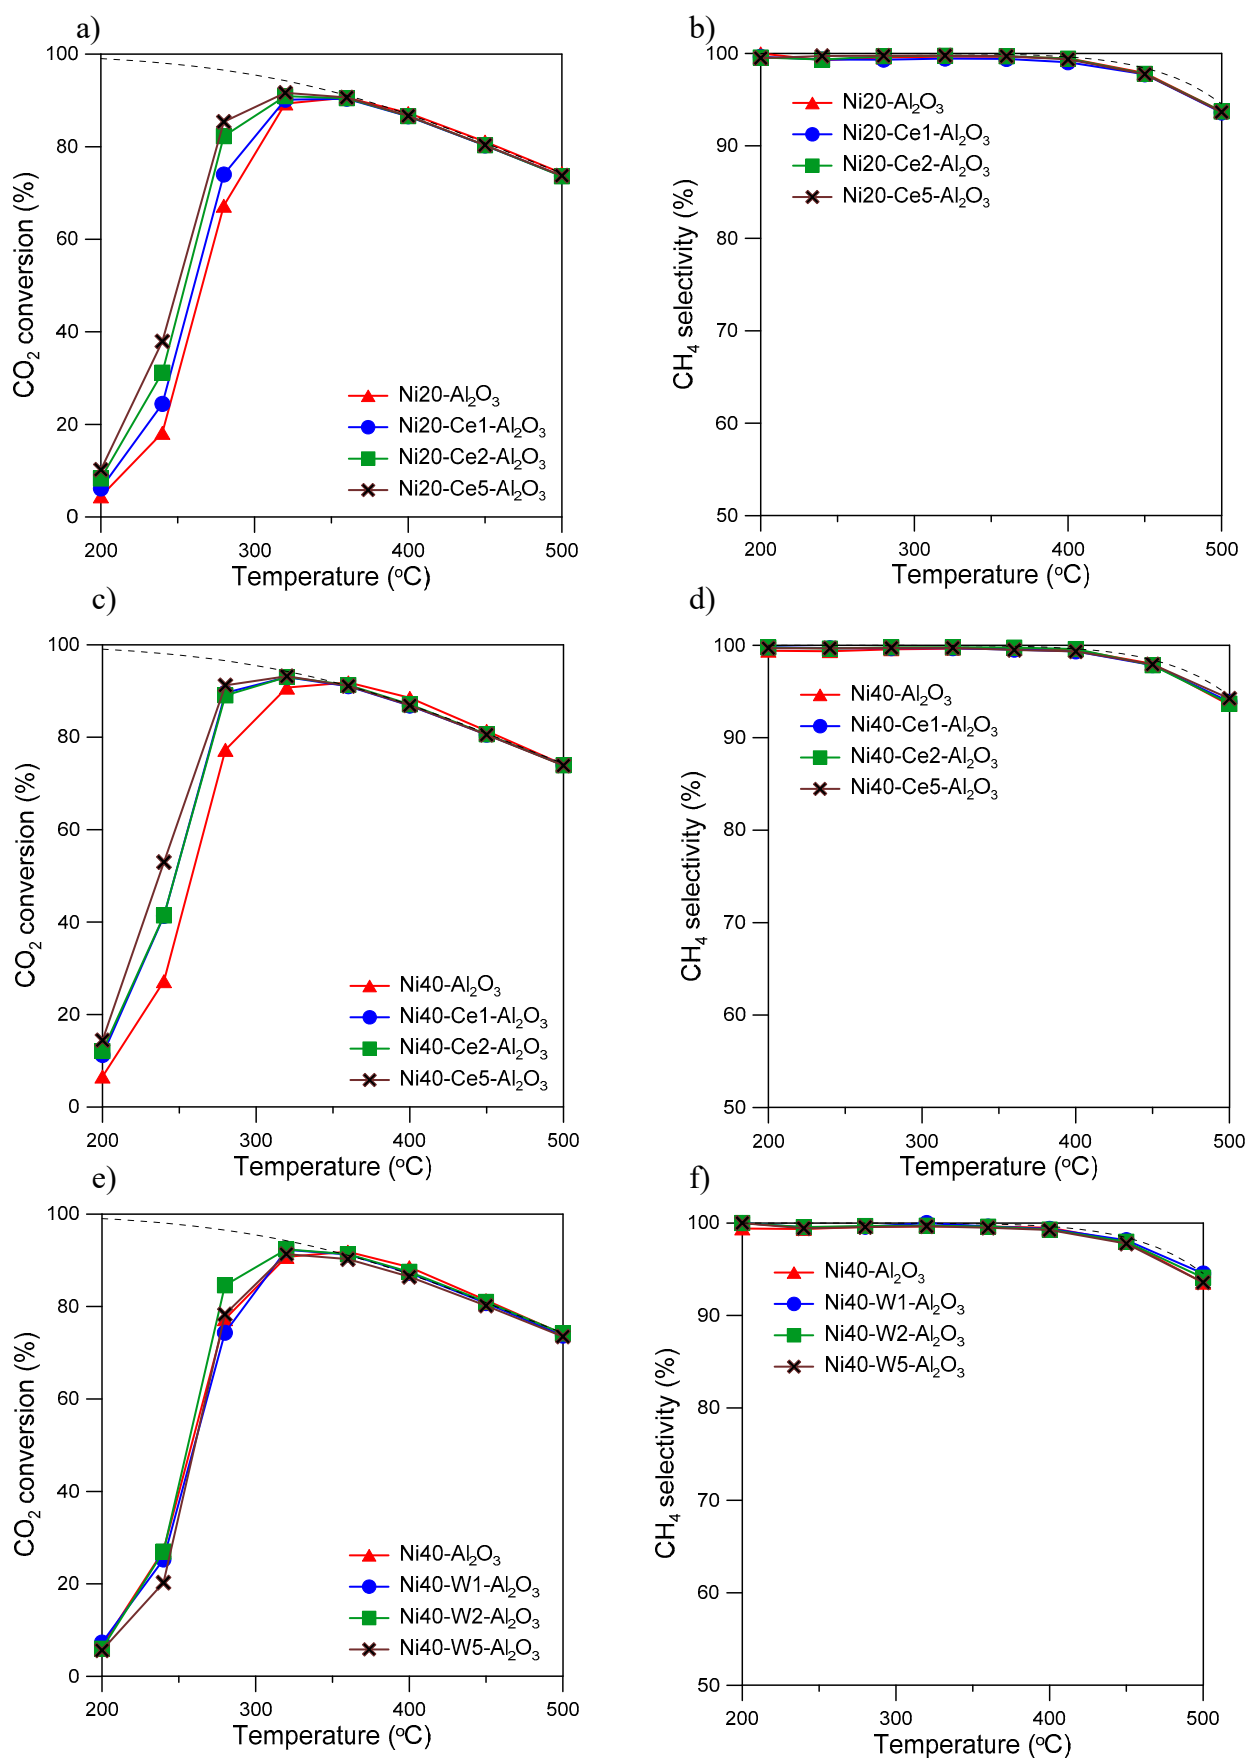

**Figure S3.** CO<sub>2</sub> conversion (a,c,e) and selectivity to CH<sub>4</sub> (b,d,f) of cerium and tungsten promoted alumina supported nickel catalysts in CO<sub>2</sub> methanation reaction.

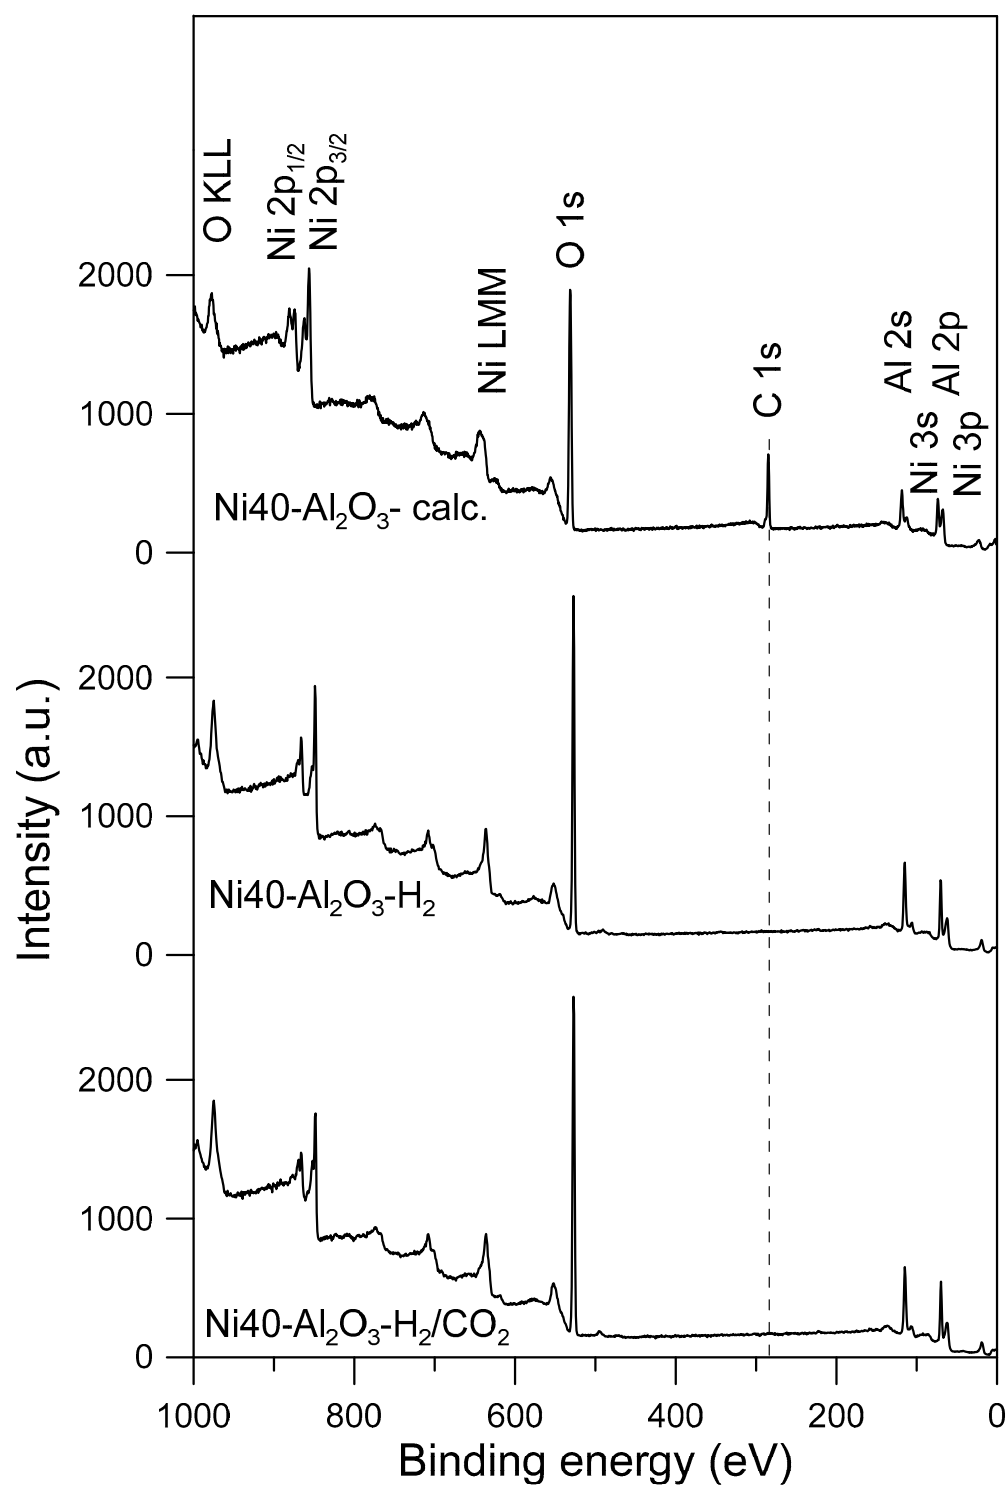

**Figure S4.a.** Survey XPS scans of Ni<sub>40</sub>-Al<sub>2</sub>O<sub>3</sub> catalyst after calcination (“-calc.”), activation in hydrogen (“-H<sub>2</sub>”) and CO<sub>2</sub> methanation reaction (“-H<sub>2</sub>/CO<sub>2</sub>”).

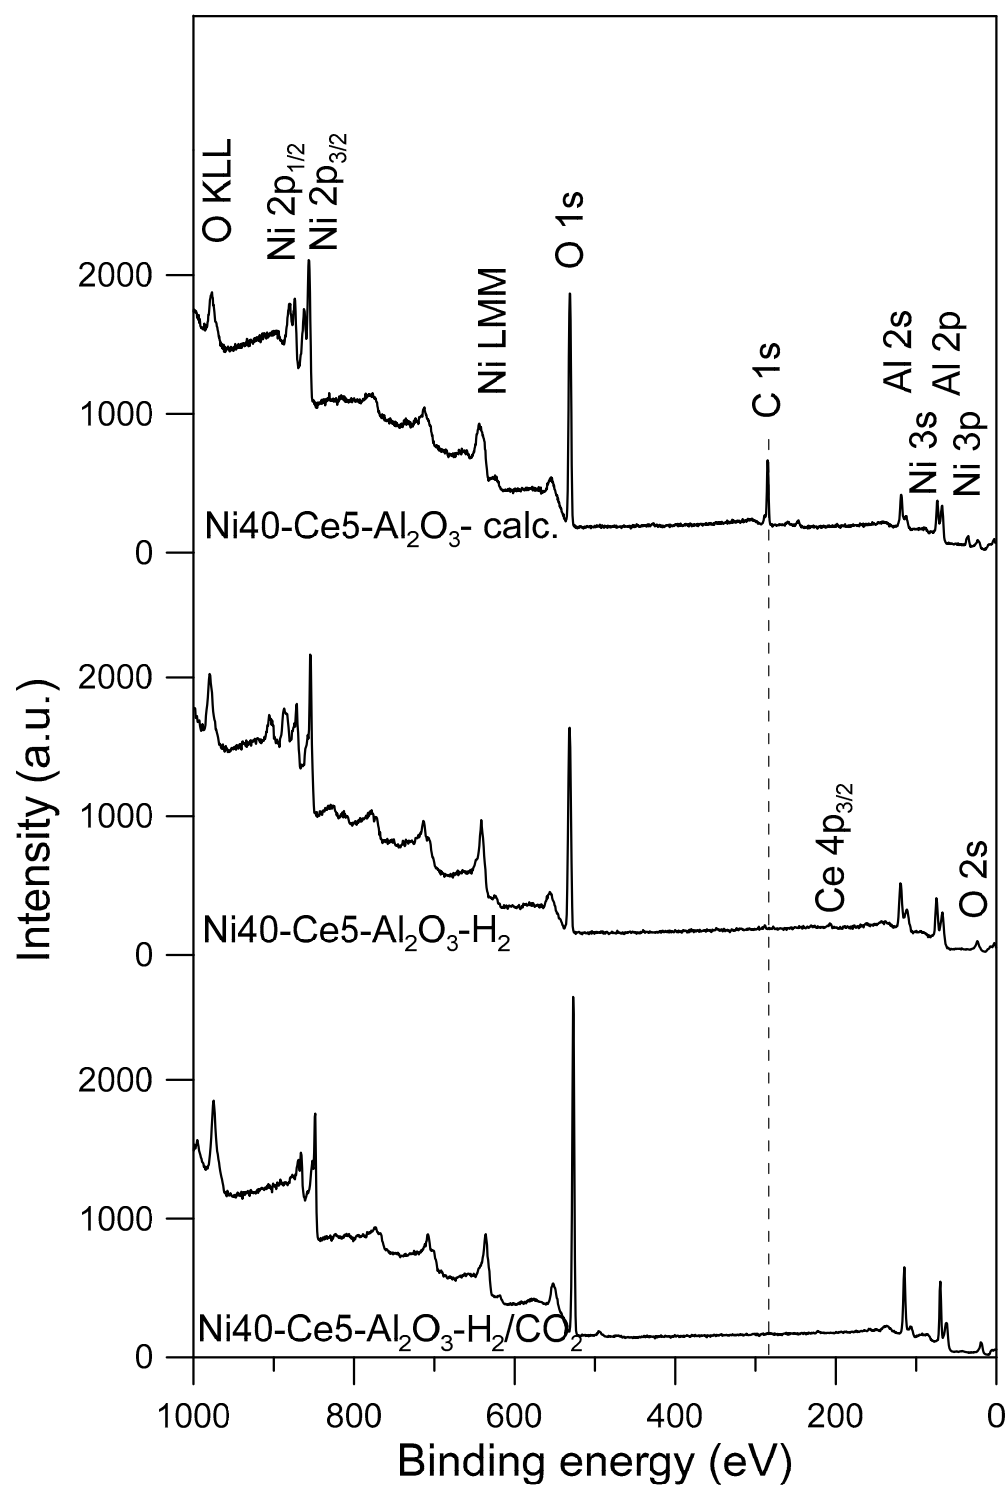

**Figure S4.b.** Survey XPS scans of Ni<sub>40</sub>-Ce<sub>5</sub>-Al<sub>2</sub>O<sub>3</sub> catalyst after calcination (“-calc.”), activation in hydrogen (“-H<sub>2</sub>”) and CO<sub>2</sub> methanation reaction (“-H<sub>2</sub>/CO<sub>2</sub>”).

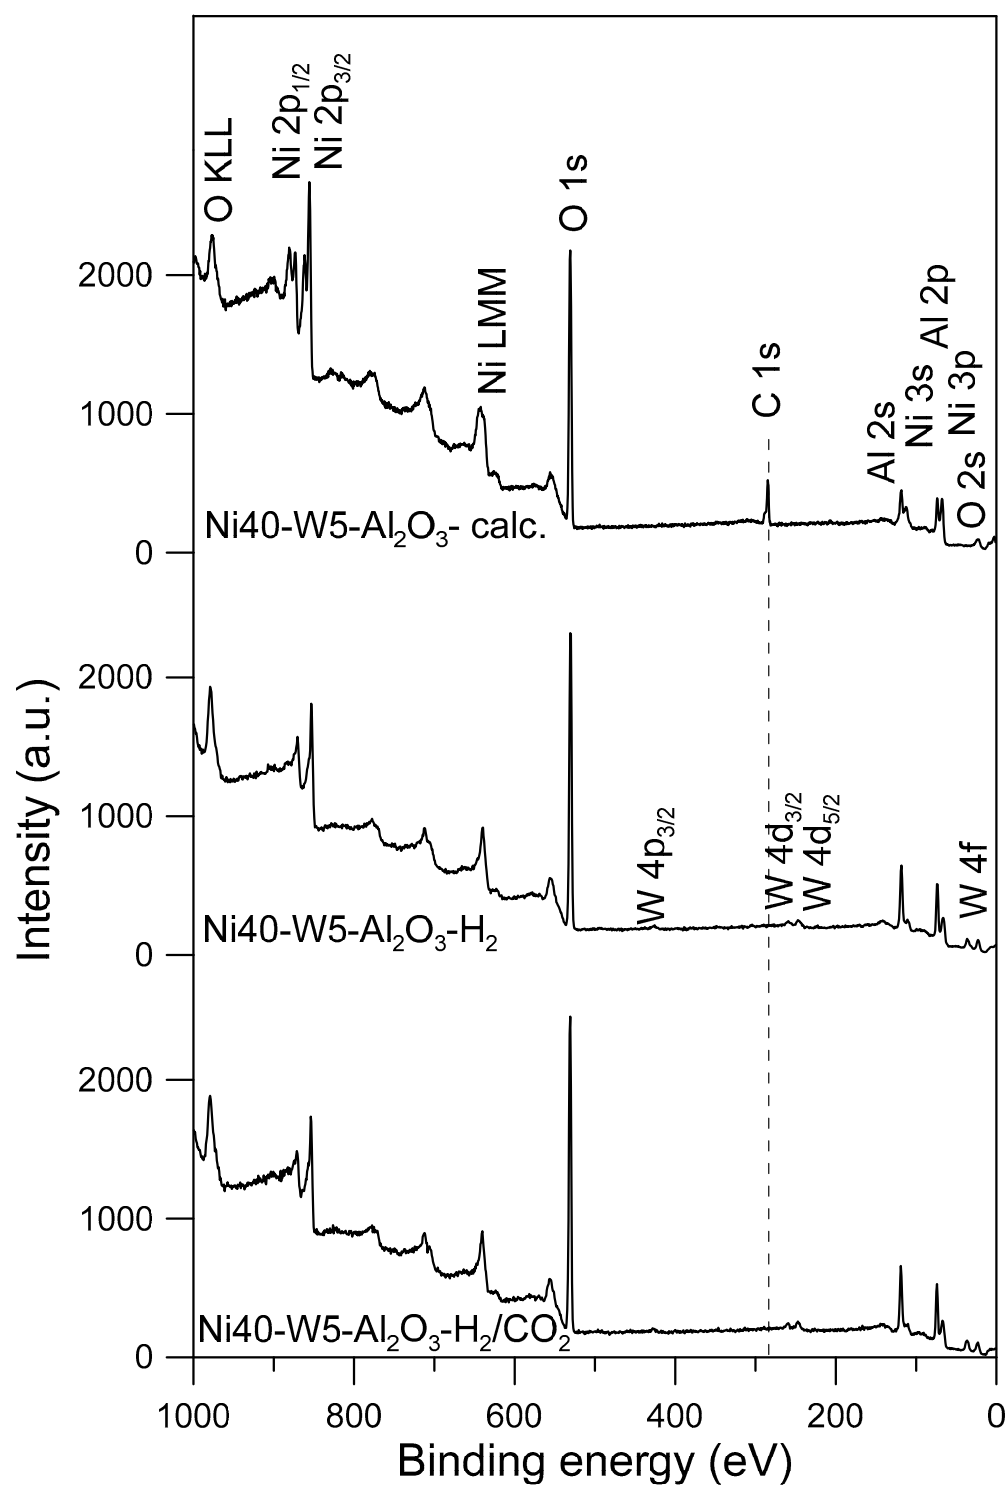

**Figure S4.c.** Survey XPS scans of Ni40-W5-Al<sub>2</sub>O<sub>3</sub> catalyst after calcination (“-calc.”), activation in hydrogen (“-H<sub>2</sub>”) and CO<sub>2</sub> methanation reaction (“-H<sub>2</sub>/CO<sub>2</sub>”).

Table S1. The analysis of XPS peaks from the XPS studies of catalysts after calcination (“-calc.”), activation in hydrogen (“-H<sub>2</sub>”) and CO<sub>2</sub> methanation reaction (“-H<sub>2</sub>/CO<sub>2</sub>”).

| Sample identifier                                       | Name                             | Position | FWHM | Raw area |
|---------------------------------------------------------|----------------------------------|----------|------|----------|
| Ni 2p <sub>3/2</sub>                                    |                                  |          |      |          |
| Ni40-Al <sub>2</sub> O <sub>3</sub> -calc.              | NiAl <sub>2</sub> O <sub>4</sub> | 854.6    | 2.54 | 8.885    |
| Ni40-Al <sub>2</sub> O <sub>3</sub> -calc.              | NiAl <sub>2</sub> O <sub>4</sub> | 856.1    | 2.51 | 7.765    |
| Ni40-Al <sub>2</sub> O <sub>3</sub> -calc.              | NiAl <sub>2</sub> O <sub>4</sub> | 857.9    | 2.07 | 0.890    |
| Ni40-Al <sub>2</sub> O <sub>3</sub> -calc.              | NiAl <sub>2</sub> O <sub>4</sub> | 861.3    | 4.41 | 10.764   |
| Ni40-Al <sub>2</sub> O <sub>3</sub> -calc.              | NiAl <sub>2</sub> O <sub>4</sub> | 865.7    | 3.06 | 0.984    |
| Ni40-Ce5- Al <sub>2</sub> O <sub>3</sub> -calc.         | NiAl <sub>2</sub> O <sub>4</sub> | 854.62   | 2.54 | 8.885    |
| Ni40-Ce5- Al <sub>2</sub> O <sub>3</sub> -calc.         | NiAl <sub>2</sub> O <sub>4</sub> | 856.14   | 2.51 | 7.765    |
| Ni40-Ce5- Al <sub>2</sub> O <sub>3</sub> -calc.         | NiAl <sub>2</sub> O <sub>4</sub> | 857.86   | 2.07 | 0.890    |
| Ni40-Ce5- Al <sub>2</sub> O <sub>3</sub> -calc.         | NiAl <sub>2</sub> O <sub>4</sub> | 861.28   | 4.41 | 10.764   |
| Ni40-Ce5- Al <sub>2</sub> O <sub>3</sub> -calc.         | NiAl <sub>2</sub> O <sub>4</sub> | 865.74   | 3.06 | 0.984    |
| Ni40-W5- Al <sub>2</sub> O <sub>3</sub> -calc.          | NiAl <sub>2</sub> O <sub>4</sub> | 854.89   | 2.17 | 9.968    |
| Ni40-W5- Al <sub>2</sub> O <sub>3</sub> -calc.          | NiAl <sub>2</sub> O <sub>4</sub> | 856.56   | 2.40 | 12.861   |
| Ni40-W5- Al <sub>2</sub> O <sub>3</sub> -calc.          | NiAl <sub>2</sub> O <sub>4</sub> | 858.28   | 2.46 | 1.845    |
| Ni40-W5- Al <sub>2</sub> O <sub>3</sub> -calc.          | NiAl <sub>2</sub> O <sub>4</sub> | 861.91   | 4.27 | 15.077   |
| Ni40-W5- Al <sub>2</sub> O <sub>3</sub> -calc.          | NiAl <sub>2</sub> O <sub>4</sub> | 866.21   | 3.69 | 2.116    |
| Ni40-Al <sub>2</sub> O <sub>3</sub> -H <sub>2</sub>     | Ni <sup>0</sup>                  | 852.5    | 1.14 | 15.422   |
| Ni40-Al <sub>2</sub> O <sub>3</sub> -H <sub>2</sub>     | Ni <sup>0</sup>                  | 856.2    | 3.28 | 1.197    |
| Ni40-Al <sub>2</sub> O <sub>3</sub> -H <sub>2</sub>     | Ni <sup>0</sup>                  | 858.5    | 2.50 | 1.934    |
| Ni40-Al <sub>2</sub> O <sub>3</sub> -H <sub>2</sub>     | NiOOH                            | 854.5    | 1.35 | 0.113    |
| Ni40-Al <sub>2</sub> O <sub>3</sub> -H <sub>2</sub>     | NiOOH                            | 855.2    | 6.96 | 0.405    |
| Ni40-Al <sub>2</sub> O <sub>3</sub> -H <sub>2</sub>     | NiOOH                            | 855.6    | 1.50 | 0.317    |
| Ni40-Al <sub>2</sub> O <sub>3</sub> -H <sub>2</sub>     | NiOOH                            | 856.4    | 1.50 | 0.676    |
| Ni40-Al <sub>2</sub> O <sub>3</sub> -H <sub>2</sub>     | NiOOH                            | 857.7    | 2.04 | 0.284    |
| Ni40-Al <sub>2</sub> O <sub>3</sub> -H <sub>2</sub>     | NiOOH                            | 861.8    | 2.94 | 0.240    |
| Ni40-Al <sub>2</sub> O <sub>3</sub> -H <sub>2</sub>     | NiOOH                            | 864.3    | 4.71 | 0.372    |
| Ni40-Ce5-Al <sub>2</sub> O <sub>3</sub> -H <sub>2</sub> | Ni <sup>0</sup>                  | 852.54   | 1.14 | 15.426   |
| Ni40-Ce5-Al <sub>2</sub> O <sub>3</sub> -H <sub>2</sub> | Ni <sup>0</sup>                  | 856.19   | 3.27 | 1.197    |
| Ni40-Ce5-Al <sub>2</sub> O <sub>3</sub> -H <sub>2</sub> | Ni <sup>0</sup>                  | 858.49   | 2.49 | 2.127    |
| Ni40-Ce5-Al <sub>2</sub> O <sub>3</sub> -H <sub>2</sub> | NiAl <sub>2</sub> O <sub>4</sub> | 854.90   | 2.70 | 0.716    |
| Ni40-Ce5-Al <sub>2</sub> O <sub>3</sub> -H <sub>2</sub> | NiAl <sub>2</sub> O <sub>4</sub> | 856.57   | 2.99 | 1.315    |
| Ni40-Ce5-Al <sub>2</sub> O <sub>3</sub> -H <sub>2</sub> | NiAl <sub>2</sub> O <sub>4</sub> | 858.29   | 3.06 | 0.189    |
| Ni40-Ce5-Al <sub>2</sub> O <sub>3</sub> -H <sub>2</sub> | NiAl <sub>2</sub> O <sub>4</sub> | 861.82   | 5.30 | 1.890    |
| Ni40-Ce5-Al <sub>2</sub> O <sub>3</sub> -H <sub>2</sub> | NiAl <sub>2</sub> O <sub>4</sub> | 866.22   | 4.59 | 0.216    |
| Ni40-Ce5-Al <sub>2</sub> O <sub>3</sub> -H <sub>2</sub> | NiOOH                            | 854.19   | 1.41 | 0.071    |

|                                                                          |                                  |        |      |        |
|--------------------------------------------------------------------------|----------------------------------|--------|------|--------|
| Ni40-Ce5-Al <sub>2</sub> O <sub>3</sub> -H <sub>2</sub>                  | NiOOH                            | 854.87 | 1.52 | 0.166  |
| Ni40-Ce5-Al <sub>2</sub> O <sub>3</sub> -H <sub>2</sub>                  | NiOOH                            | 855.29 | 1.57 | 0.201  |
| Ni40-Ce5-Al <sub>2</sub> O <sub>3</sub> -H <sub>2</sub>                  | NiOOH                            | 856.09 | 1.57 | 0.429  |
| Ni40-Ce5-Al <sub>2</sub> O <sub>3</sub> -H <sub>2</sub>                  | x                                | 850.78 | 2.28 | 3.298  |
| Ni40-W5-Al <sub>2</sub> O <sub>3</sub> -H <sub>2</sub>                   | Ni <sup>0</sup>                  | 852.63 | 1.71 | 7.697  |
| Ni40-W5-Al <sub>2</sub> O <sub>3</sub> -H <sub>2</sub>                   | Ni <sup>0</sup>                  | 856.28 | 4.91 | 0.597  |
| Ni40-W5-Al <sub>2</sub> O <sub>3</sub> -H <sub>2</sub>                   | Ni <sup>0</sup>                  | 858.66 | 3.74 | 0.965  |
| Ni40-W5-Al <sub>2</sub> O <sub>3</sub> -H <sub>2</sub>                   | Ni <sup>0</sup> -W               | 854.13 | 1.41 | 4.432  |
| Ni40-W5-Al <sub>2</sub> O <sub>3</sub> -H <sub>2</sub>                   | NiAl <sub>2</sub> O <sub>4</sub> | 857.94 | 2.17 | 1.365  |
| Ni40-W5-Al <sub>2</sub> O <sub>3</sub> -H <sub>2</sub>                   | NiAl <sub>2</sub> O <sub>4</sub> | 859.61 | 2.40 | 1.560  |
| Ni40-W5-Al <sub>2</sub> O <sub>3</sub> -H <sub>2</sub>                   | NiAl <sub>2</sub> O <sub>4</sub> | 861.33 | 2.46 | 0.224  |
| Ni40-W5-Al <sub>2</sub> O <sub>3</sub> -H <sub>2</sub>                   | NiAl <sub>2</sub> O <sub>4</sub> | 864.95 | 4.27 | 0.537  |
| Ni40-W5-Al <sub>2</sub> O <sub>3</sub> -H <sub>2</sub>                   | NiAl <sub>2</sub> O <sub>4</sub> | 869.26 | 3.69 | 0.257  |
| Ni40-W5-Al <sub>2</sub> O <sub>3</sub> -H <sub>2</sub>                   | NiOOH                            | 854.58 | 1.34 | 0.147  |
| Ni40-W5-Al <sub>2</sub> O <sub>3</sub> -H <sub>2</sub>                   | NiOOH                            | 855.26 | 1.44 | 0.340  |
| Ni40-W5-Al <sub>2</sub> O <sub>3</sub> -H <sub>2</sub>                   | NiOOH                            | 855.68 | 1.49 | 0.412  |
| Ni40-W5-Al <sub>2</sub> O <sub>3</sub> -H <sub>2</sub>                   | NiOOH                            | 856.48 | 1.49 | 0.879  |
| Ni40-W5-Al <sub>2</sub> O <sub>3</sub> -H <sub>2</sub>                   | NiOOH                            | 857.78 | 2.02 | 0.370  |
| Ni40-W5-Al <sub>2</sub> O <sub>3</sub> -H <sub>2</sub>                   | NiOOH                            | 861.88 | 2.92 | 0.400  |
| Ni40-W5-Al <sub>2</sub> O <sub>3</sub> -H <sub>2</sub>                   | NiOOH                            | 864.38 | 4.67 | 0.484  |
|                                                                          |                                  |        |      |        |
| Ni40-Al <sub>2</sub> O <sub>3</sub> -H <sub>2</sub> /CO <sub>2</sub>     | Ni <sup>0</sup>                  | 852.6  | 1.33 | 14.084 |
| Ni40-Al <sub>2</sub> O <sub>3</sub> -H <sub>2</sub> /CO <sub>2</sub>     | Ni <sup>0</sup>                  | 856.3  | 3.81 | 1.093  |
| Ni40-Al <sub>2</sub> O <sub>3</sub> -H <sub>2</sub> /CO <sub>2</sub>     | Ni <sup>0</sup>                  | 858.6  | 2.90 | 2.512  |
| Ni40-Al <sub>2</sub> O <sub>3</sub> -H <sub>2</sub> /CO <sub>2</sub>     | NiOOH                            | 854.4  | 1.50 | 0.221  |
| Ni40-Al <sub>2</sub> O <sub>3</sub> -H <sub>2</sub> /CO <sub>2</sub>     | NiOOH                            | 855.1  | 4.41 | 0.650  |
| Ni40-Al <sub>2</sub> O <sub>3</sub> -H <sub>2</sub> /CO <sub>2</sub>     | NiOOH                            | 855.5  | 1.67 | 0.509  |
| Ni40-Al <sub>2</sub> O <sub>3</sub> -H <sub>2</sub> /CO <sub>2</sub>     | NiOOH                            | 856.3  | 1.67 | 1.086  |
| Ni40-Al <sub>2</sub> O <sub>3</sub> -H <sub>2</sub> /CO <sub>2</sub>     | NiOOH                            | 857.6  | 2.26 | 0.648  |
| Ni40-Al <sub>2</sub> O <sub>3</sub> -H <sub>2</sub> /CO <sub>2</sub>     | NiOOH                            | 861.7  | 3.27 | 1.008  |
| Ni40-Al <sub>2</sub> O <sub>3</sub> -H <sub>2</sub> /CO <sub>2</sub>     | NiOOH                            | 864.2  | 5.24 | 0.598  |
| Ni40-Ce5-Al <sub>2</sub> O <sub>3</sub> -H <sub>2</sub> /CO <sub>2</sub> | Ni <sup>0</sup>                  | 852.60 | 1.21 | 15.773 |
| Ni40-Ce5-Al <sub>2</sub> O <sub>3</sub> -H <sub>2</sub> /CO <sub>2</sub> | Ni <sup>0</sup>                  | 856.25 | 3.47 | 1.224  |
| Ni40-Ce5-Al <sub>2</sub> O <sub>3</sub> -H <sub>2</sub> /CO <sub>2</sub> | Ni <sup>0</sup>                  | 858.63 | 2.64 | 2.248  |
| Ni40-Ce5-Al <sub>2</sub> O <sub>3</sub> -H <sub>2</sub> /CO <sub>2</sub> | NiAl <sub>2</sub> O <sub>4</sub> | 854.89 | 1.80 | 0.748  |
| Ni40-Ce5-Al <sub>2</sub> O <sub>3</sub> -H <sub>2</sub> /CO <sub>2</sub> | NiAl <sub>2</sub> O <sub>4</sub> | 856.56 | 1.99 | 0.965  |
| Ni40-Ce5-Al <sub>2</sub> O <sub>3</sub> -H <sub>2</sub> /CO <sub>2</sub> | NiAl <sub>2</sub> O <sub>4</sub> | 858.28 | 2.04 | 0.138  |
| Ni40-Ce5-Al <sub>2</sub> O <sub>3</sub> -H <sub>2</sub> /CO <sub>2</sub> | NiAl <sub>2</sub> O <sub>4</sub> | 861.90 | 3.53 | 1.131  |
| Ni40-Ce5-Al <sub>2</sub> O <sub>3</sub> -H <sub>2</sub> /CO <sub>2</sub> | NiAl <sub>2</sub> O <sub>4</sub> | 866.21 | 3.06 | 0.159  |
| Ni40-Ce5-Al <sub>2</sub> O <sub>3</sub> -H <sub>2</sub> /CO <sub>2</sub> | NiOOH                            | 854.93 | 1.41 | 0.105  |
| Ni40-Ce5-Al <sub>2</sub> O <sub>3</sub> -H <sub>2</sub> /CO <sub>2</sub> | NiOOH                            | 855.60 | 1.52 | 0.244  |
| Ni40-Ce5-Al <sub>2</sub> O <sub>3</sub> -H <sub>2</sub> /CO <sub>2</sub> | NiOOH                            | 856.03 | 1.57 | 0.296  |
| Ni40-Ce5-Al <sub>2</sub> O <sub>3</sub> -H <sub>2</sub> /CO <sub>2</sub> | NiOOH                            | 856.83 | 1.57 | 0.632  |
| Ni40-Ce5-Al <sub>2</sub> O <sub>3</sub> -H <sub>2</sub> /CO <sub>2</sub> | NiOOH                            | 858.13 | 2.13 | 0.266  |
| Ni40-Ce5-Al <sub>2</sub> O <sub>3</sub> -H <sub>2</sub> /CO <sub>2</sub> | NiOOH                            | 862.23 | 3.07 | 0.224  |
| Ni40-Ce5-Al <sub>2</sub> O <sub>3</sub> -H <sub>2</sub> /CO <sub>2</sub> | NiOOH                            | 864.73 | 4.92 | 0.348  |



|                                                                         |                                                 |        |      |       |
|-------------------------------------------------------------------------|-------------------------------------------------|--------|------|-------|
| Ni40-W5-Al <sub>2</sub> O <sub>3</sub> -H <sub>2</sub> /CO <sub>2</sub> | Ni <sup>0</sup>                                 | 852.29 | 1.68 | 6.342 |
| Ni40-W5-Al <sub>2</sub> O <sub>3</sub> -H <sub>2</sub> /CO <sub>2</sub> | Ni <sup>0</sup>                                 | 855.94 | 4.81 | 0.492 |
| Ni40-W5-Al <sub>2</sub> O <sub>3</sub> -H <sub>2</sub> /CO <sub>2</sub> | Ni <sup>0</sup>                                 | 858.32 | 3.66 | 0.795 |
| Ni40-W5-Al <sub>2</sub> O <sub>3</sub> -H <sub>2</sub> /CO <sub>2</sub> | Ni <sup>0</sup> -W                              | 853.77 | 1.45 | 4.215 |
| Ni40-W5-Al <sub>2</sub> O <sub>3</sub> -H <sub>2</sub> /CO <sub>2</sub> | NiAl <sub>2</sub> O <sub>4</sub>                | 857.94 | 2.17 | 1.365 |
| Ni40-W5-Al <sub>2</sub> O <sub>3</sub> -H <sub>2</sub> /CO <sub>2</sub> | NiAl <sub>2</sub> O <sub>4</sub>                | 859.61 | 2.40 | 1.560 |
| Ni40-W5-Al <sub>2</sub> O <sub>3</sub> -H <sub>2</sub> /CO <sub>2</sub> | NiAl <sub>2</sub> O <sub>4</sub>                | 861.33 | 2.46 | 0.224 |
| Ni40-W5-Al <sub>2</sub> O <sub>3</sub> -H <sub>2</sub> /CO <sub>2</sub> | NiAl <sub>2</sub> O <sub>4</sub>                | 864.95 | 4.27 | 0.537 |
| Ni40-W5-Al <sub>2</sub> O <sub>3</sub> -H <sub>2</sub> /CO <sub>2</sub> | NiAl <sub>2</sub> O <sub>4</sub>                | 869.26 | 3.69 | 0.257 |
| Ni40-W5-Al <sub>2</sub> O <sub>3</sub> -H <sub>2</sub> /CO <sub>2</sub> | NiAl <sub>2</sub> O <sub>4</sub>                | 857.94 | 2.17 | 1.365 |
| Ni40-W5-Al <sub>2</sub> O <sub>3</sub> -H <sub>2</sub> /CO <sub>2</sub> | NiOOH                                           | 854.58 | 1.34 | 0.180 |
| Ni40-W5-Al <sub>2</sub> O <sub>3</sub> -H <sub>2</sub> /CO <sub>2</sub> | NiOOH                                           | 855.26 | 1.44 | 0.418 |
| Ni40-W5-Al <sub>2</sub> O <sub>3</sub> -H <sub>2</sub> /CO <sub>2</sub> | NiOOH                                           | 855.68 | 1.49 | 0.507 |
| Ni40-W5-Al <sub>2</sub> O <sub>3</sub> -H <sub>2</sub> /CO <sub>2</sub> | NiOOH                                           | 856.48 | 1.49 | 1.082 |
| Ni40-W5-Al <sub>2</sub> O <sub>3</sub> -H <sub>2</sub> /CO <sub>2</sub> | NiOOH                                           | 857.78 | 2.02 | 0.455 |
| Ni40-W5-Al <sub>2</sub> O <sub>3</sub> -H <sub>2</sub> /CO <sub>2</sub> | NiOOH                                           | 861.88 | 2.92 | 0.492 |
| Ni40-W5-Al <sub>2</sub> O <sub>3</sub> -H <sub>2</sub> /CO <sub>2</sub> | NiOOH                                           | 864.38 | 4.67 | 0.596 |
| W 4f <sub>7/2</sub>                                                     |                                                 |        |      |       |
| Ni40-W5-Al <sub>2</sub> O <sub>3</sub> -H <sub>2</sub>                  | W <sup>0</sup>                                  | 30.93  | 0.93 | 0.127 |
| Ni40-W5-Al <sub>2</sub> O <sub>3</sub> -H <sub>2</sub>                  | W-O                                             | 32.07  | 1.11 | 0.222 |
| Ni40-W5-Al <sub>2</sub> O <sub>3</sub> -H <sub>2</sub>                  | WO <sub>2</sub>                                 | 33.15  | 1.01 | 0.121 |
| Ni40-W5-Al <sub>2</sub> O <sub>3</sub> -H <sub>2</sub>                  | WO <sub>3</sub>                                 | 34.55  | 1.04 | 0.212 |
| Ni40-W5-Al <sub>2</sub> O <sub>3</sub> -H <sub>2</sub>                  | WO <sub>3</sub> /Al <sub>2</sub> O <sub>3</sub> | 35.66  | 1.04 | 0.392 |
| W 5p <sub>3/2</sub>                                                     |                                                 |        |      |       |
| Ni40-W5-Al <sub>2</sub> O <sub>3</sub> -H <sub>2</sub>                  | W <sup>0</sup>                                  | 36.60  | 1.13 | -     |
| Ni40-W5-Al <sub>2</sub> O <sub>3</sub> -H <sub>2</sub>                  | W-O                                             | 37.70  | 1.13 | -     |
| W 4f <sub>7/2</sub>                                                     |                                                 |        |      |       |
| Ni40-W5-Al <sub>2</sub> O <sub>3</sub> -H <sub>2</sub> /CO <sub>2</sub> | W <sup>0</sup>                                  | 30.85  | 0.87 | 0.051 |
| Ni40-W5-Al <sub>2</sub> O <sub>3</sub> -H <sub>2</sub> /CO <sub>2</sub> | W-O                                             | 32.08  | 0.83 | 0.064 |
| Ni40-W5-Al <sub>2</sub> O <sub>3</sub> -H <sub>2</sub> /CO <sub>2</sub> | WO <sub>2</sub>                                 | 33.07  | 1.05 | 0.069 |
| Ni40-W5-Al <sub>2</sub> O <sub>3</sub> -H <sub>2</sub> /CO <sub>2</sub> | WO <sub>3</sub>                                 | 34.60  | 1.14 | 0.422 |
| Ni40-W5-Al <sub>2</sub> O <sub>3</sub> -H <sub>2</sub> /CO <sub>2</sub> | WO <sub>3</sub> /Al <sub>2</sub> O <sub>3</sub> | 35.44  | 1.04 | 0.356 |
| W 5p <sub>3/2</sub>                                                     |                                                 |        |      |       |
| Ni40-W5-Al <sub>2</sub> O <sub>3</sub> -H <sub>2</sub> /CO <sub>2</sub> | W <sup>0</sup>                                  | 36.38  | 1.48 | -     |
| Ni40-W5-Al <sub>2</sub> O <sub>3</sub> -H <sub>2</sub> /CO <sub>2</sub> | W-O                                             | 37.62  | 1.48 | -     |
